# Supplementary material for: Psychological Distress Among Caregivers of Individuals With a Diagnosis of Schizophrenia or Schizoaffective Disorder
Source: Atypon-hosted journal article supplement (doi:10.1176/appi.ps.201600422), 2017-10-02

Online Supplement Appendix Table 1. Scale Construction

|                                                                                                                                                                                                                                             | Number of Items | Scale Construction                   | Score Range | High Score Interpretation |
|---------------------------------------------------------------------------------------------------------------------------------------------------------------------------------------------------------------------------------------------|-----------------|--------------------------------------|-------------|---------------------------|
| <b>Group 2 variables</b>                                                                                                                                                                                                                    |                 |                                      |             |                           |
| <b>Demands on the caregiver</b>                                                                                                                                                                                                             |                 |                                      |             |                           |
| Caregiving provided in past 12 months                                                                                                                                                                                                       | 1               | Translation to 0-100                 | (0 -- 100)- | Negative                  |
| Concern with medication discontinuation                                                                                                                                                                                                     | 1               | Translation to 0-100                 | (0 -- 100)- | Negative                  |
| Confidence in medication effectiveness                                                                                                                                                                                                      | 1               | Translation to 0-100                 | (0 -- 100)+ | Positive                  |
| Intensity of caregiving assistance provided -                                                                                                                                                                                               |                 |                                      |             |                           |
| Activities of Daily Living (ADLs) and Instrumental IADLs                                                                                                                                                                                    | 9               | Item sum                             | (0 -- 32)-  | Negative                  |
| Monitoring behavior                                                                                                                                                                                                                         | 7               | Item sum                             | (0 -- 28)-  | Negative                  |
| <b>Group 3 variables</b>                                                                                                                                                                                                                    |                 |                                      |             |                           |
| <b>Coping resources &amp; supports</b>                                                                                                                                                                                                      |                 |                                      |             |                           |
| Support                                                                                                                                                                                                                                     | 5               | Item sum and then translate to 0-100 | (0 -- 100)+ | Positive                  |
| <b>Group 4 variables</b>                                                                                                                                                                                                                    |                 |                                      |             |                           |
| <b>Cognitive appraisals of caregiving</b>                                                                                                                                                                                                   |                 |                                      |             |                           |
| Perceived financial burden                                                                                                                                                                                                                  | 1               | Translation to 0-100                 | (0 -- 100)- | Negative                  |
| Perceived lack of emotional rewards                                                                                                                                                                                                         | 1               | Translation to 0-100                 | (0 -- 100)+ |                           |
| <b>Outcome variable</b>                                                                                                                                                                                                                     |                 |                                      |             |                           |
| Perceived Stress Scale Score (PSS)                                                                                                                                                                                                          | 10              | Item sum                             | (0-39)-     | Negative                  |
| Formula to translate a scale score to a 0-100 range: $Y=(X-\text{min})*100/(\text{max}-\text{min})$ where X is the original scale score, min is the minimum value in the original scale and max is the maximum score in the original scale. |                 |                                      |             |                           |

Online Supplement Appendix Table 2. Modifying Effect Test

| Variables                                                            | LR Test<br>p value |
|----------------------------------------------------------------------|--------------------|
| <b>Interaction effect with one-degree of freedom<sup>a</sup></b>     | .263               |
| <b>Overall Interactions</b>                                          |                    |
| <b>Group 1 variables</b>                                             |                    |
| Caregiver age                                                        | .949               |
| Care recipient age                                                   | .098               |
| First diagnosed within 5 years vs. other time periods                | .494               |
| Caregiver number of chronic conditions                               | .046               |
| <b>Interaction of each demand and other variable with Support</b>    |                    |
| <b>Group 2 variables</b>                                             |                    |
| Caregiver employed vs. not employed                                  | .672               |
| Caregiver retired vs. employed or not employed                       | .873               |
| Primary caregiver vs. not primary caregiver                          | .042               |
| Caregiving provided in past 12 months                                | .208               |
| Concern with medication discontinuation                              | .566               |
| Confidence in medication effectiveness                               | .278               |
| Number of hospitalizations in past 12 months                         | .825               |
| <i>Intensity of assistance with -</i>                                |                    |
| Activities of Daily Living (ADLs) and Instrumental IADLs             | .023               |
| Monitoring behavior                                                  | .736               |
| <b>Interaction of Support variable with demands and other blocks</b> |                    |
| <b>Group 3 variable</b>                                              |                    |
| Support                                                              | .117               |

<sup>a</sup> In the one-degree of freedom approach, first the Group 2 variables (Demands) and Group 3 variable (Support) were regressed on the Perceived Stress Scale Score (PSS). Then, each demand variable was multiplied by its respective coefficient from the main effect only model (to create a demand effect factor), and was then regressed on PSS. A similar procedure was then applied to the Support variable to get a support effect factor. These two factors were then multiplied together to create one overall interaction term which was then tested in the regression model with PSS. Apart from the one-degree of freedom test, the overall effects of each demand variable with the support variable and the support variable with the demand variable as a block were also tested through a likelihood ratio test.

**Online Supplement Appendix Table 3. Structural Equation Models of Caregiver Psychological Distress Based on the Perceived Stress Scale Score with Tests of Mediation by Cognitive Appraisals of Caregiving as Financially Burdensome and as Emotionally Unrewarding (N = 1,142)<sup>a</sup>**

|                                                                                   | Direct effects |                            |                |       | Indirect effects |                            |        |   | Total effects |                            |                |       |
|-----------------------------------------------------------------------------------|----------------|----------------------------|----------------|-------|------------------|----------------------------|--------|---|---------------|----------------------------|----------------|-------|
|                                                                                   | Coefficient    | Coefficient (Standardized) | 95% CI         | p     | Coefficient      | Coefficient (Standardized) | 95% CI | p | Coefficient   | Coefficient (Standardized) | 95% CI         | p     |
| <b>Caregiving perceived as financial burden as dependent variable<sup>b</sup></b> |                |                            |                |       |                  |                            |        |   |               |                            |                |       |
| <b>Group 1 variables</b>                                                          |                |                            |                |       |                  |                            |        |   |               |                            |                |       |
| <b>Caregiver and care recipient characteristics</b>                               |                |                            |                |       |                  |                            |        |   |               |                            |                |       |
| Caregiver age                                                                     | 0.18           | 0.07                       | 0.02 to 0.34   | .03   | No Path          |                            |        |   | 0.18          | 0.07                       | 0.02 to 0.34   | .03   |
| Care recipient age                                                                | -0.38          | -0.18                      | -0.52 to -0.24 | <.001 | No Path          |                            |        |   | -0.38         | -0.18                      | -0.52 to -0.24 | <.001 |
| Diagnosis within 5 years                                                          | -0.71          | -0.01                      | -5.74 to 4.32  | .78   | No Path          |                            |        |   | -0.71         | -0.01                      | -5.74 to 4.32  | .78   |
| Caregiver number of chronic conditions                                            | 1.26           | 0.08                       | 0.35 to 2.17   | <.01  | No Path          |                            |        |   | 1.26          | 0.08                       | 0.35 to 2.17   | <.01  |
| <b>Group 2 variables</b>                                                          |                |                            |                |       |                  |                            |        |   |               |                            |                |       |
| <b>Demands on the caregiver</b>                                                   |                |                            |                |       |                  |                            |        |   |               |                            |                |       |
| Primary caregiver vs. not primary caregiver                                       | 7.04           | 0.09                       | 2.19 to 11.89  | <.01  | No Path          |                            |        |   | 7.04          | 0.09                       | 2.19 to 11.89  | <.01  |
| Caregiving provided in past 12 months                                             | 0.19           | 0.14                       | 0.10 to 0.28   | <.001 | No Path          |                            |        |   | 0.19          | 0.14                       | 0.10 to 0.28   | <.001 |
| Concern with medication discontinuation                                           | 0.07           | 0.07                       | 0.02 to 0.12   | .01   | No Path          |                            |        |   | 0.07          | 0.07                       | 0.02 to 0.12   | .01   |
| Confidence in medication effectiveness                                            | -0.03          | -0.02                      | -0.10 to 0.04  | .39   | No Path          |                            |        |   | -0.03         | -0.02                      | -0.10 to 0.04  | .39   |
| Number of hospitalizations in past 12 months                                      | 0.59           | 0.05                       | -0.19 to 1.37  | .14   | No Path          |                            |        |   | 0.59          | 0.05                       | -0.19 to 1.37  | .14   |
| <b>Intensity of assistance with -</b>                                             |                |                            |                |       |                  |                            |        |   |               |                            |                |       |
| Activities of Daily Living (ADLs) and Instrumental IADLs <sup>c</sup>             | 0.47           | 0.12                       | 0.19 to 0.75   | <.01  | No Path          |                            |        |   | 0.47          | 0.12                       | 0.19 to 0.75   | <.01  |
| Monitoring behavior <sup>d</sup>                                                  | 1.15           | 0.19                       | 0.73 to 1.57   | <.001 | No Path          |                            |        |   | 1.15          | 0.19                       | 0.73 to 1.57   | <.001 |
| <b>Group 3 variables</b>                                                          |                |                            |                |       |                  |                            |        |   |               |                            |                |       |
| <b>Coping resources &amp; supports</b>                                            |                |                            |                |       |                  |                            |        |   |               |                            |                |       |
| Support <sup>e</sup>                                                              | -0.22          | -0.17                      | -0.29 to -0.15 | <.001 | No Path          |                            |        |   | -0.22         | -0.17                      | -0.29 to -0.15 | <.001 |

|                                                                                        | Direct effects |                            |                 |       | Indirect effects |                            |        |   | Total effects |                            |                 |       |
|----------------------------------------------------------------------------------------|----------------|----------------------------|-----------------|-------|------------------|----------------------------|--------|---|---------------|----------------------------|-----------------|-------|
|                                                                                        | Coefficient    | Coefficient (Standardized) | 95% CI          | p     | Coefficient      | Coefficient (Standardized) | 95% CI | p | Coefficient   | Coefficient (Standardized) | 95% CI          | p     |
| <b>Caregiver perceived lack of emotional rewards as dependent variable<sup>b</sup></b> |                |                            |                 |       |                  |                            |        |   |               |                            |                 |       |
| <b>Group 1 variables</b>                                                               |                |                            |                 |       |                  |                            |        |   |               |                            |                 |       |
| <b>Caregiver and care recipient characteristics</b>                                    |                |                            |                 |       |                  |                            |        |   |               |                            |                 |       |
| Caregiver age                                                                          | 0.11           | 0.04                       | -0.08 to 0.30   | .25   | No Path          |                            |        |   | 0.11          | 0.04                       | -0.08 to 0.30   | .25   |
| Care recipient age                                                                     | 0.09           | 0.04                       | -0.07 to 0.25   | .27   | No Path          |                            |        |   | 0.09          | 0.04                       | -0.07 to 0.25   | .27   |
| Diagnosis within 5 years                                                               | 4.02           | 0.05                       | -1.77 to 9.81   | .17   | No Path          |                            |        |   | 4.02          | 0.05                       | -1.77 to 9.81   | .17   |
| Caregiver number of chronic conditions                                                 | -0.27          | -0.02                      | -1.32 to 0.78   | .61   | No Path          |                            |        |   | -0.27         | -0.02                      | -1.32 to 0.78   | .61   |
| <b>Group 2 variables</b>                                                               |                |                            |                 |       |                  |                            |        |   |               |                            |                 |       |
| <b>Demands on the caregiver</b>                                                        |                |                            |                 |       |                  |                            |        |   |               |                            |                 |       |
| Primary caregiver vs. not primary caregiver                                            | -5.72          | -0.07                      | -11.30 to -0.14 | .04   | No Path          |                            |        |   | -5.72         | -0.07                      | -11.30 to -0.14 | .04   |
| Caregiving provided in past 12 months                                                  | -0.02          | -0.01                      | -0.12 to 0.08   | .71   | No Path          |                            |        |   | -0.02         | -0.01                      | -0.12 to 0.08   | .71   |
| Concern with medication discontinuation                                                | 0.10           | 0.11                       | 0.04 to 0.16    | <.01  | No Path          |                            |        |   | 0.10          | 0.11                       | 0.04 to 0.16    | <.01  |
| Confidence in medication effectiveness                                                 | -0.22          | -0.18                      | -0.30 to -0.14  | <.001 | No Path          |                            |        |   | -0.22         | -0.18                      | -0.30 to -0.14  | <.001 |
| Number of hospitalizations in past 12 months                                           | -0.14          | -0.01                      | -1.04 to 0.76   | .76   | No Path          |                            |        |   | -0.14         | -0.01                      | -1.04 to 0.76   | .76   |
| <b>Intensity of assistance with -</b>                                                  |                |                            |                 |       |                  |                            |        |   |               |                            |                 |       |
| Activities of Daily Living (ADLs) and Instrumental IADLs <sup>c</sup>                  | -0.61          | -0.15                      | -0.93 to -0.29  | <.001 | No Path          |                            |        |   | -0.61         | -0.15                      | -0.93 to -0.29  | <.001 |
| Monitoring behavior <sup>d</sup>                                                       | 0.60           | 0.09                       | 0.11 to 1.09    | .02   | No Path          |                            |        |   | 0.60          | 0.09                       | 0.11 to 1.09    | .02   |
| <b>Group 3 variables</b>                                                               |                |                            |                 |       |                  |                            |        |   |               |                            |                 |       |
| <b>Coping resources &amp; supports</b>                                                 |                |                            |                 |       |                  |                            |        |   |               |                            |                 |       |
| Support <sup>e</sup>                                                                   | -0.19          | -0.14                      | -0.28 to -0.10  | <.001 | No Path          |                            |        |   | -0.19         | -0.14                      | -0.28 to -0.10  | <.001 |



|                                                                                                    |         |       |                |        |         |       |                |       |       |       |                |       |
|----------------------------------------------------------------------------------------------------|---------|-------|----------------|--------|---------|-------|----------------|-------|-------|-------|----------------|-------|
| <b>Caregiver psychological distress (Perceived Stress Score) as dependent variable<sup>f</sup></b> |         |       |                |        |         |       |                |       |       |       |                |       |
| <b>Group 1 variables</b>                                                                           |         |       |                |        |         |       |                |       |       |       |                |       |
| <b>Caregiver and care recipient characteristics</b>                                                |         |       |                |        |         |       |                |       |       |       |                |       |
| Caregiver age                                                                                      | -0.03   | -0.06 | -0.07 to 0.01  | 0.13   | 0.01    | 0.02  | 0.00 to 0.02   | .01   | -0.03 | -0.05 | -0.07 to 0.01  | .13   |
| Care recipient age                                                                                 | No Path | 0.01  |                |        | -0.01   | -0.02 | -0.02 to -0.00 | .01   | -0.01 | -0.01 | -0.04 to 0.02  | .53   |
| Diagnosis within 5 years                                                                           | 0.01    | 0.00  | -1.09 to 1.11  | 0.99   | 0.08    | 0.00  | -0.14 to 0.30  | .48   | 0.09  | 0.01  | -1.03 to 1.21  | .87   |
| Caregiver number of chronic conditions                                                             | 0.48    | 0.14  | 0.28 to 0.68   | <0.001 | 0.03    | 0.01  | -0.01 to 0.07  | .17   | 0.51  | 0.15  | 0.31 to 0.71   | <.001 |
| <b>Group 2 variables</b>                                                                           |         |       |                |        |         |       |                |       |       |       |                |       |
| <b>Demands on the caregiver</b>                                                                    |         |       |                |        |         |       |                |       |       |       |                |       |
| Caregiver employed vs. not employed                                                                | 0.91    | 0.06  | -0.03 to 1.85  | 0.06   | No Path |       |                |       | 0.91  | 0.06  | -0.03 to 1.85  | .06   |
| Caregiver retired vs. employed or not employed                                                     | -2.13   | -0.06 | -4.24 to -0.02 | 0.05   | No Path |       |                |       | -2.13 | -0.06 | -4.24 to -0.02 | .05   |
| Primary caregiver vs. not primary caregiver                                                        | 0.77    | 0.05  | -0.30 to 1.84  | 0.16   | 0.07    | 0.00  | -0.17 to 0.31  | .57   | 0.85  | 0.05  | -0.23 to 1.93  | .12   |
| Caregiving provided in past 12 months                                                              | -0.01   | -0.02 | -0.03 to 0.01  | 0.32   | 0.01    | 0.02  | 0.01 to 0.01   | <.001 | -0.00 | -0.00 | -0.02 to 0.02  | 1.00  |
| Concern with medication discontinuation                                                            | 0.01    | 0.06  | -0.00 to 0.02  | 0.10   | No Path |       |                |       | 0.02  | 0.09  | 0.01 to 0.03   | <.01  |
| Confidence in medication effectiveness                                                             | -0.03   | -0.11 | -0.05 to -0.01 | <0.001 | -0.01   | -0.03 | -0.01 to -0.01 | <.001 | -0.03 | -0.13 | -0.05 to -0.01 | <.001 |
| Number of hospitalizations in past 12 months                                                       | 0.10    | 0.04  | -0.07 to 0.27  | 0.26   | 0.01    | 0.01  | -0.03 to 0.05  | .58   | 0.12  | 0.04  | -0.06 to 0.30  | .18   |
| Intensity of assistance with -                                                                     |         |       |                |        |         |       |                |       |       |       |                |       |
| Activities of Daily Living (ADLs) and Instrumental IADLs <sup>c</sup>                              | 0.12    | 0.14  | 0.06 to 0.18   | <0.001 | No Path |       |                |       | 0.12  | 0.14  | 0.06 to 0.18   | <.001 |
| Monitoring behavior <sup>d</sup>                                                                   | 0.17    | 0.13  | 0.08 to 0.26   | <0.001 | 0.05    | 0.04  | 0.02 to 0.08   | <.001 | 0.22  | 0.16  | 0.13 to 0.31   | <.001 |
| <b>Group 3 variables</b>                                                                           |         |       |                |        |         |       |                |       |       |       |                |       |
| <b>Coping resources &amp; supports</b>                                                             |         |       |                |        |         |       |                |       |       |       |                |       |
| Support <sup>e</sup>                                                                               | -0.03   | -0.12 | -0.05 to -0.01 | <0.01  | -0.01   | -0.04 | -0.02 to -0.00 | <.01  | -0.04 | -0.16 | -0.06 to -0.02 | <.001 |
| <b>Group 4 variables</b>                                                                           |         |       |                |        |         |       |                |       |       |       |                |       |
| <b>Cognitive appraisals of caregiving<sup>b</sup></b>                                              |         |       |                |        |         |       |                |       |       |       |                |       |
| Perceived financial burden                                                                         | 0.03    | 0.14  | 0.02 to 0.04   | <0.001 | No Path |       |                |       | 0.03  | 0.14  | 0.02 to 0.04   | <.001 |
| Perceived lack of emotional rewards                                                                | 0.03    | 0.12  | 0.02 to 0.04   | <0.001 | No Path |       |                |       | 0.03  | 0.12  | 0.02 to 0.04   | <.001 |

<sup>a</sup> The maximum likelihood with missing values estimation method was used to minimize the impact of missing values in the model.

- <sup>b</sup> The score range is 0-100, with a higher score indicating greater perceived financial burden or greater perceived lack of emotional rewards.
- <sup>c</sup> The score range is 0-32 (8 questions with a maximum of 4 points per question), with a higher score indicating more caregiver assistance.
- <sup>d</sup> The score range is 0-28 (7 questions with a maximum of 4 points per question), with a higher score indicating more caregiver assistance.
- <sup>e</sup> The score range is 0-100, with a higher score indicating greater availability.
- <sup>f</sup> The score range is 0-39, with a higher score indicating more psychological distress.

**Online Supplement Appendix Table 4. Fit Statistics for Structural Equation Models**

|       | Value                                                        | Description                              | Interpretation                                         |
|-------|--------------------------------------------------------------|------------------------------------------|--------------------------------------------------------|
| RMSEA | .03<br>(.000, .060)<br>Probability<br>RMSEA <=<br>.05 = .839 | Root mean squared error of approximation | Values of .07 or below indicate a well-fitting model   |
| CFI   | .993                                                         | Comparative fit index                    | Values of .90 or greater indicate a well-fitting model |
| TLI   | .941                                                         | Tucker-Lewis index                       | Values of .95 or greater indicate a well-fitting model |





Online Supplement Appendix Figure 1 CONSORT Diagram

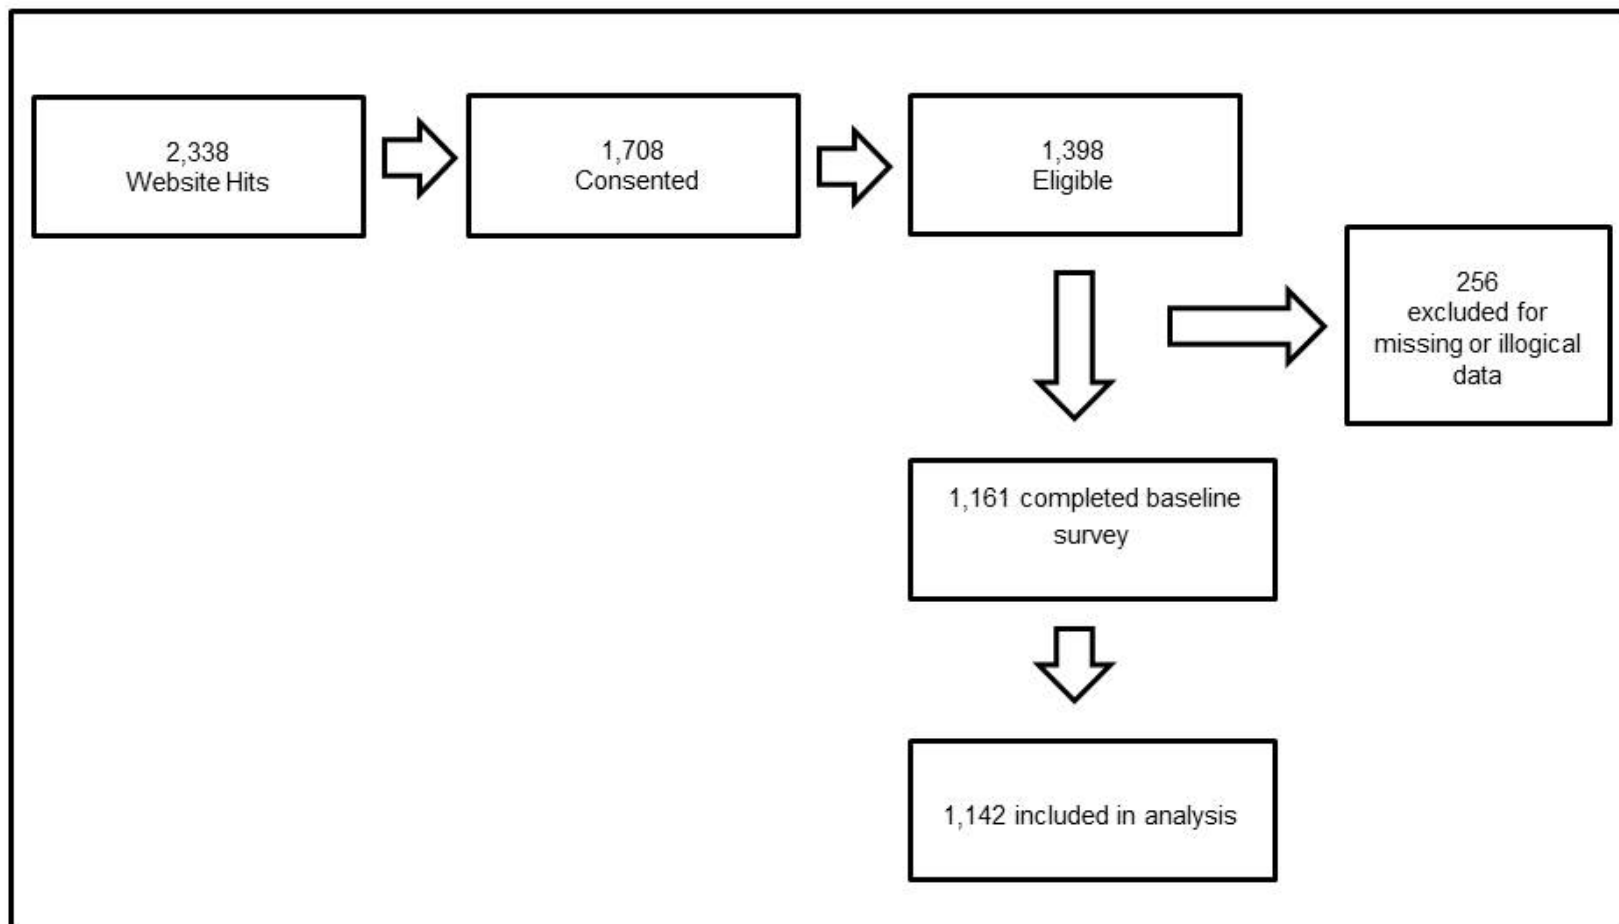

Figure 1. Structural Equation Models of Caregiver Psychological Distress (N = 1,142)

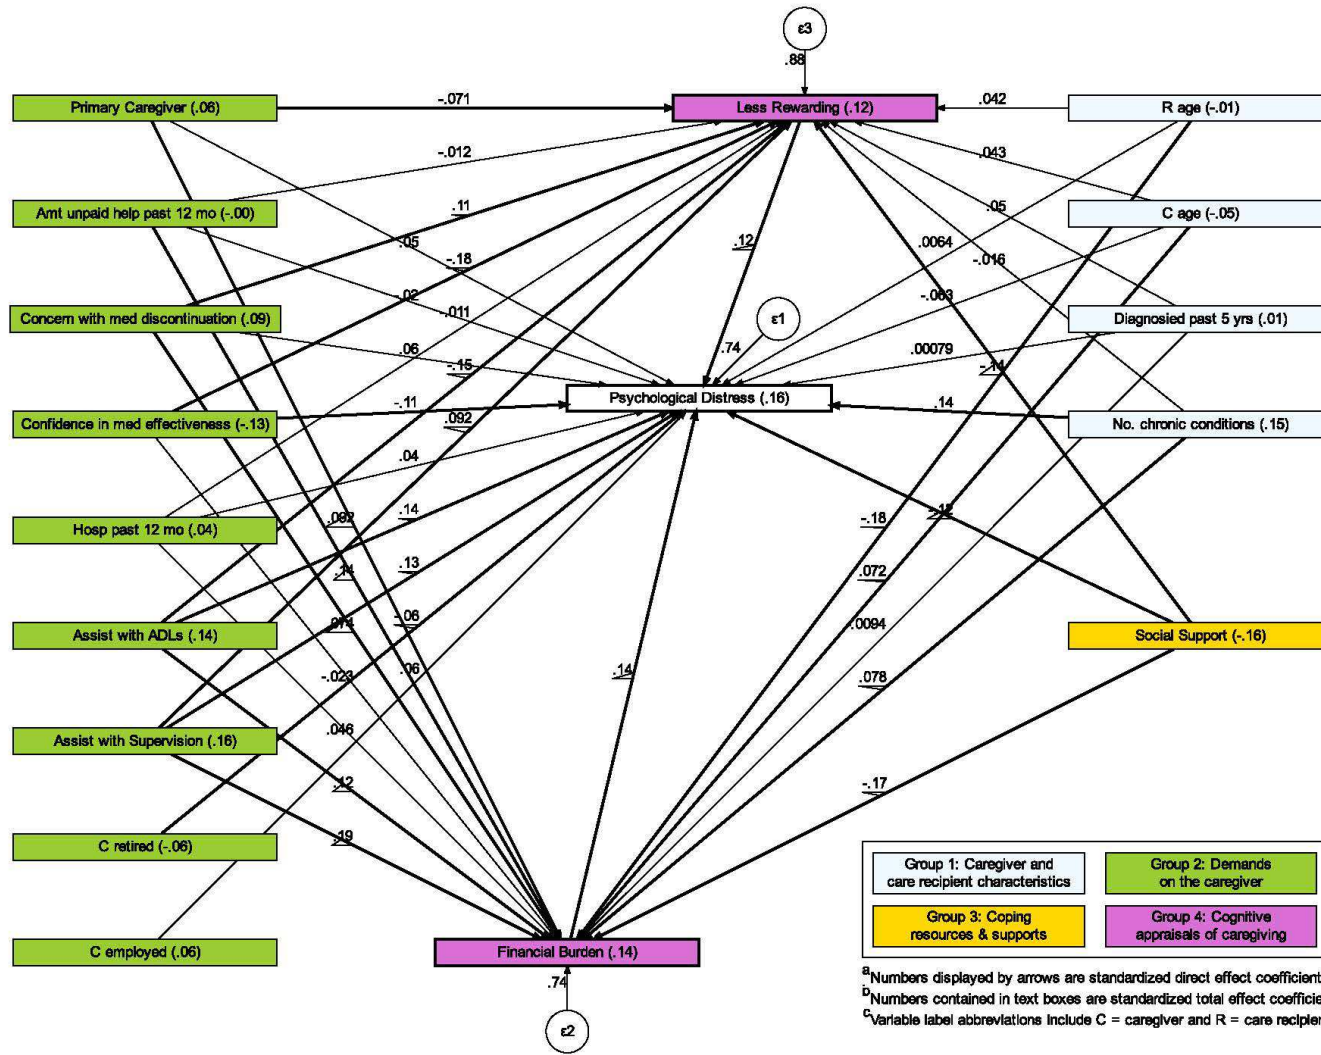

Supplement: appi.ps.201600422.ds001.pdf [file appi.ps.201600422.ds001.pdf]
